# Supplementary material
Source: PubMed Central journal article supplement (PMC2675700)
Supplement: NIHMS74402-supplement-SI.pdf [file NIHMS74402-supplement-SI.pdf]

## Supporting Information

# The Unnatural Substrate Repertoire of A, B, and X Family DNA polymerases

*Gil Tae Hwang and Floyd E. Romesberg*

### Table of Contents

|                                                                                                               |     |
|---------------------------------------------------------------------------------------------------------------|-----|
| <b>Table S1.</b> Kf–Mediated Incorporation of Natural and Unnatural Triphosphates<br>dNTPs (dXTPs)            | S2  |
| <b>Table S2.</b> Kf–Mediated Extension of dX:dY Pairs                                                         | S3  |
| <b>Table S3.</b> T7–Mediated Incorporation of Natural and Unnatural Triphosphates<br>dNTPs (dXTPs)            | S4  |
| <b>Table S4.</b> T7–Mediated Extension of dX:dY Pairs                                                         | S5  |
| <b>Table S5.</b> Taq–Mediated Incorporation of Natural and Unnatural Triphosphates<br>dNTPs (dXTPs)           | S6  |
| <b>Table S6.</b> Taq–Mediated Extension of dX:dY Pairs                                                        | S7  |
| <b>Table S7.</b> Vent–Mediated Incorporation of Natural and Unnatural Triphosphates<br>dNTPs (dXTPs)          | S8  |
| <b>Table S8.</b> Vent–Mediated Extension of dX:dY Pairs                                                       | S9  |
| <b>Table S9.</b> Therminator–Mediated Incorporation of Natural and Unnatural<br>Triphosphates dNTPs (dXTPs)   | S10 |
| <b>Table S10.</b> Therminator–Mediated Extension of dX:dY Pairs                                               | S11 |
| <b>Table S11.</b> Pol $\beta$ –Mediated Incorporation of Natural and Unnatural Triphosphates<br>dNTPs (dXTPs) | S12 |
| <b>Table S12.</b> Pol $\beta$ –Mediated Extension of dX:dY Pairs                                              | S13 |
| <b>References</b>                                                                                             | S14 |

**Table S1.** Kf-Mediated Incorporation of Natural and Unnatural Triphosphates dNTPs (dXTPs)<sup>a,b</sup>

| 5' -dTAAATACGACTCACTATAGGGAGA                          |               |                                       |                     |                                                                    |
|--------------------------------------------------------|---------------|---------------------------------------|---------------------|--------------------------------------------------------------------|
| 3' -dATTATGCTGAGTGATATCCCTCT (Y) GCTAGGTTACGGCAGGATCGC |               |                                       |                     |                                                                    |
| X                                                      | Y             | $k_{\text{cat}}$ (min <sup>-1</sup> ) | $K_{\text{M}}$ (μM) | $k_{\text{cat}}/K_{\text{M}}$ (M <sup>-1</sup> min <sup>-1</sup> ) |
| dA                                                     | dT            | 6.0 ± 0.9                             | 0.019 ± 0.001       | 3.2 × 10 <sup>8</sup>                                              |
| dG                                                     | dT            | 4.4 ± 0.3                             | 77 ± 12             | 5.7 × 10 <sup>4</sup>                                              |
| <b>dPICS</b>                                           | <b>dPICS</b>  | 0.90 ± 0.04                           | 3.7 ± 0.7           | 2.4 × 10 <sup>5</sup>                                              |
| dA                                                     | <b>dPICS</b>  | 0.17 ± 0.07                           | 92 ± 30             | 1.8 × 10 <sup>3</sup>                                              |
| dC                                                     | <b>dPICS</b>  | 0.22 ± 0.12                           | 123 ± 81            | 1.8 × 10 <sup>3</sup>                                              |
| dG                                                     | <b>dPICS</b>  | 0.12 ± 0.04                           | 69 ± 22             | 1.7 × 10 <sup>3</sup>                                              |
| dT                                                     | <b>dPICS</b>  | 0.89 ± 0.15                           | 76 ± 36             | 1.2 × 10 <sup>4</sup>                                              |
| <b>d7AI</b>                                            | <b>d7AI</b>   | 8.7 ± 0.5                             | 40 ± 5              | 2.2 × 10 <sup>5</sup>                                              |
| dA                                                     | <b>d7AI</b>   | 0.32 ± 0.02                           | 54 ± 10             | 5.9 × 10 <sup>3</sup>                                              |
| dC                                                     | <b>d7AI</b>   | 0.17 ± 0.02                           | 31 ± 11             | 5.5 × 10 <sup>3</sup>                                              |
| dG                                                     | <b>d7AI</b>   | 0.08 ± 0.01                           | 49 ± 13             | 1.6 × 10 <sup>3</sup>                                              |
| dT                                                     | <b>d7AI</b>   | 0.23 ± 0.05                           | 146 ± 40            | 1.6 × 10 <sup>3</sup>                                              |
| <b>d3FB</b>                                            | <b>d3FB</b>   | 25 ± 4                                | 12 ± 2              | 2.1 × 10 <sup>6</sup>                                              |
| dA                                                     | <b>d3FB</b>   | 26 ± 4                                | 48 ± 10             | 5.4 × 10 <sup>5</sup>                                              |
| dC                                                     | <b>d3FB</b>   | 0.4 ± 0.1                             | 195 ± 35            | 2.1 × 10 <sup>3</sup>                                              |
| dG                                                     | <b>d3FB</b>   | 0.3 ± 0.1                             | 168 ± 80            | 1.8 × 10 <sup>3</sup>                                              |
| dT                                                     | <b>d3FB</b>   | 15 ± 8                                | 158 ± 23            | 9.5 × 10 <sup>4</sup>                                              |
| <b>dMMO2</b>                                           | <b>d5SICS</b> | 12 ± 1                                | 33 ± 6              | 3.6 × 10 <sup>5</sup>                                              |
| <b>d5SICS</b>                                          | <b>d5SICS</b> | 1.7 ± 0.5                             | 63 ± 4              | 2.7 × 10 <sup>4</sup>                                              |
| dA                                                     | <b>d5SICS</b> | 1.2 ± 0.3                             | 54 ± 6              | 2.2 × 10 <sup>4</sup>                                              |
| dC                                                     | <b>d5SICS</b> | nd <sup>c</sup>                       | nd <sup>c</sup>     | <1.0 × 10 <sup>3</sup>                                             |
| dG                                                     | <b>d5SICS</b> | 4.6 ± 0.6                             | 36 ± 4              | 1.3 × 10 <sup>5</sup>                                              |
| dT                                                     | <b>d5SICS</b> | 1.7 ± 0.2                             | 130 ± 19            | 1.3 × 10 <sup>4</sup>                                              |
| <b>d5SICS</b>                                          | <b>dMMO2</b>  | 8.5 ± 0.1                             | 0.18 ± 0.01         | 4.7 × 10 <sup>7</sup>                                              |
| <b>dMMO2</b>                                           | <b>dMMO2</b>  | 5.1 ± 0.7                             | 44 ± 4              | 1.2 × 10 <sup>5</sup>                                              |
| dA                                                     | <b>dMMO2</b>  | 3.3 ± 0.3                             | 32 ± 4              | 1.0 × 10 <sup>5</sup>                                              |
| dC                                                     | <b>dMMO2</b>  | nd <sup>c</sup>                       | nd <sup>c</sup>     | <1.0 × 10 <sup>3</sup>                                             |
| dG                                                     | <b>dMMO2</b>  | nd <sup>c</sup>                       | nd <sup>c</sup>     | <1.0 × 10 <sup>3</sup>                                             |
| dT                                                     | <b>dMMO2</b>  | nd <sup>c</sup>                       | nd <sup>c</sup>     | <1.0 × 10 <sup>3</sup>                                             |

<sup>a</sup>See experimental section for experimental details. <sup>b</sup>Ref. 1–4. <sup>c</sup>Reaction was too inefficient for  $k_{\text{cat}}$  and  $K_{\text{M}}$  to be determined.

**Table S2.** Kf-Mediated Extension of dX:dY Pairs<sup>a,b</sup>

| 5' -dTAATACGACTCACTATAGGGAGA ( <b>X</b> )                       |               |                                       |                                  |                                                                    |
|-----------------------------------------------------------------|---------------|---------------------------------------|----------------------------------|--------------------------------------------------------------------|
| 3' -dATTATGCTGAGTGATATCCCTCT ( <b>Y</b> ) GCTAGGTTACGGCAGGATCGC |               |                                       |                                  |                                                                    |
| <b>X</b>                                                        | <b>Y</b>      | $k_{\text{cat}}$ (min <sup>-1</sup> ) | $K_{\text{M}}$ ( $\mu\text{M}$ ) | $k_{\text{cat}}/K_{\text{M}}$ (M <sup>-1</sup> min <sup>-1</sup> ) |
| dA                                                              | dT            | 1.3 $\pm$ 0.4                         | 0.0077 $\pm$ 0.0044              | 1.7 $\times$ 10 <sup>8</sup>                                       |
| dG                                                              | dT            | 3.6 $\pm$ 0.5                         | 7.5 $\pm$ 1.6                    | 4.8 $\times$ 10 <sup>5</sup>                                       |
| <b>dPICS</b>                                                    | <b>dPICS</b>  | nd <sup>c</sup>                       | nd <sup>c</sup>                  | <1.0 $\times$ 10 <sup>3</sup>                                      |
| dT                                                              | <b>dPICS</b>  | 2.5 $\pm$ 0.1                         | 12 $\pm$ 4                       | 2.0 $\times$ 10 <sup>5</sup>                                       |
| <b>d7AI</b>                                                     | <b>d7AI</b>   | nd <sup>c</sup>                       | nd <sup>c</sup>                  | <1.0 $\times$ 10 <sup>3</sup>                                      |
| dA                                                              | <b>d7AI</b>   | 0.11 $\pm$ 0.04                       | 56 $\pm$ 9                       | 1.9 $\times$ 10 <sup>3</sup>                                       |
| dC                                                              | <b>d7AI</b>   | 0.86 $\pm$ 0.10                       | 193 $\pm$ 8                      | 4.5 $\times$ 10 <sup>3</sup>                                       |
| <b>d3FB</b>                                                     | <b>d3FB</b>   | 28 $\pm$ 4                            | 85 $\pm$ 24                      | 3.3 $\times$ 10 <sup>5</sup>                                       |
| dA                                                              | <b>d3FB</b>   | 17 $\pm$ 4                            | 268 $\pm$ 60                     | 6.3 $\times$ 10 <sup>4</sup>                                       |
| dC                                                              | <b>d3FB</b>   | 4.2 $\pm$ 0.7                         | 310 $\pm$ 80                     | 1.4 $\times$ 10 <sup>4</sup>                                       |
| dG                                                              | <b>d3FB</b>   | nd <sup>c</sup>                       | nd <sup>c</sup>                  | <1.0 $\times$ 10 <sup>3</sup>                                      |
| dT                                                              | <b>d3FB</b>   | 25 $\pm$ 4                            | 132 $\pm$ 60                     | 1.9 $\times$ 10 <sup>5</sup>                                       |
| <b>dMMO2</b>                                                    | <b>d5SICS</b> | 6.4 $\pm$ 1.1                         | 3.4 $\pm$ 0.3                    | 1.9 $\times$ 10 <sup>6</sup>                                       |
| <b>d5SICS</b>                                                   | <b>d5SICS</b> | nd <sup>c</sup>                       | nd <sup>c</sup>                  | <1.0 $\times$ 10 <sup>3</sup>                                      |
| dG                                                              | <b>d5SICS</b> | 0.62 $\pm$ 0.02                       | 127 $\pm$ 8                      | 4.9 $\times$ 10 <sup>3</sup>                                       |
| dT                                                              | <b>d5SICS</b> | 2.0 $\pm$ 0.1                         | 4.9 $\pm$ 0.3                    | 4.0 $\times$ 10 <sup>5</sup>                                       |
| <b>d5SICS</b>                                                   | <b>dMMO2</b>  | 3.8 $\pm$ 0.3                         | 5.7 $\pm$ 1.2                    | 6.7 $\times$ 10 <sup>5</sup>                                       |
| <b>dMMO2</b>                                                    | <b>dMMO2</b>  | 0.87 $\pm$ 0.28                       | 165 $\pm$ 47                     | 5.3 $\times$ 10 <sup>3</sup>                                       |
| dA                                                              | <b>dMMO2</b>  | 8.7 $\pm$ 0.9                         | 187 $\pm$ 17                     | 4.6 $\times$ 10 <sup>4</sup>                                       |

<sup>a</sup>See experimental section for experimental details. <sup>b</sup>Ref. 1–4. <sup>c</sup>Reaction was too inefficient for  $k_{\text{cat}}$  and  $K_{\text{M}}$  to be determined.

**Table S3.** T7–Mediated Incorporation of Natural and Unnatural Triphosphates dNTPs (dXTPs)<sup>a</sup>

| 5' –dTAAATACGACTCACTATAGGGAGA                          |               |                                       |                     |                                                                    |
|--------------------------------------------------------|---------------|---------------------------------------|---------------------|--------------------------------------------------------------------|
| 3' –dATTATGCTGAGTGATATCCCTCT (Y) GCTAGGTTACGGCAGGATCGC |               |                                       |                     |                                                                    |
| X                                                      | Y             | $k_{\text{cat}}$ (min <sup>-1</sup> ) | $K_{\text{M}}$ (μM) | $k_{\text{cat}}/K_{\text{M}}$ (M <sup>-1</sup> min <sup>-1</sup> ) |
| dA                                                     | dT            | 0.36 ± 0.06                           | 0.024 ± 0.006       | 1.5 × 10 <sup>7</sup>                                              |
| dG                                                     | dT            | 1.2 ± 0.1                             | 1196 ± 90           | 9.8 × 10 <sup>2</sup>                                              |
| <b>dPICS</b>                                           | <b>dPICS</b>  | nd <sup>b</sup>                       | nd <sup>b</sup>     | <1.0 × 10 <sup>3</sup>                                             |
| dA                                                     | <b>dPICS</b>  | nd <sup>b</sup>                       | nd <sup>b</sup>     | <1.0 × 10 <sup>3</sup>                                             |
| dC                                                     | <b>dPICS</b>  | nd <sup>b</sup>                       | nd <sup>b</sup>     | <1.0 × 10 <sup>3</sup>                                             |
| dG                                                     | <b>dPICS</b>  | nd <sup>b</sup>                       | nd <sup>b</sup>     | <1.0 × 10 <sup>3</sup>                                             |
| dT                                                     | <b>dPICS</b>  | nd <sup>b</sup>                       | nd <sup>b</sup>     | <1.0 × 10 <sup>3</sup>                                             |
| <b>d7AI</b>                                            | <b>d7AI</b>   | 1.7 ± 0.2                             | 754 ± 109           | 2.2 × 10 <sup>3</sup>                                              |
| dA                                                     | <b>d7AI</b>   | 0.38 ± 0.14                           | 310 ± 55            | 1.2 × 10 <sup>3</sup>                                              |
| dC                                                     | <b>d7AI</b>   | 0.14 ± 0.01                           | 128 ± 38            | 1.1 × 10 <sup>3</sup>                                              |
| dG                                                     | <b>d7AI</b>   | nd <sup>b</sup>                       | nd <sup>b</sup>     | <1.0 × 10 <sup>3</sup>                                             |
| dT                                                     | <b>d7AI</b>   | nd <sup>b</sup>                       | nd <sup>b</sup>     | <1.0 × 10 <sup>3</sup>                                             |
| <b>d3FB</b>                                            | <b>d3FB</b>   | 1.7 ± 0.1                             | 32 ± 8              | 5.3 × 10 <sup>4</sup>                                              |
| dA                                                     | <b>d3FB</b>   | 29 ± 5                                | 259 ± 40            | 1.1 × 10 <sup>5</sup>                                              |
| dC                                                     | <b>d3FB</b>   | 0.70 ± 0.15                           | 381 ± 48            | 1.8 × 10 <sup>3</sup>                                              |
| dG                                                     | <b>d3FB</b>   | nd <sup>b</sup>                       | nd <sup>b</sup>     | <1.0 × 10 <sup>3</sup>                                             |
| dT                                                     | <b>d3FB</b>   | 0.85 ± 0.23                           | 10 ± 3              | 8.1 × 10 <sup>4</sup>                                              |
| <b>dMMO2</b>                                           | <b>d5SICS</b> | 2.1 ± 0.5                             | 57 ± 4              | 3.7 × 10 <sup>4</sup>                                              |
| <b>d5SICS</b>                                          | <b>d5SICS</b> | nd <sup>b</sup>                       | nd <sup>b</sup>     | <1.0 × 10 <sup>3</sup>                                             |
| dA                                                     | <b>d5SICS</b> | 0.37 ± 0.06                           | 221 ± 26            | 1.7 × 10 <sup>3</sup>                                              |
| dC                                                     | <b>d5SICS</b> | nd <sup>b</sup>                       | nd <sup>b</sup>     | <1.0 × 10 <sup>3</sup>                                             |
| dG                                                     | <b>d5SICS</b> | nd <sup>b</sup>                       | nd <sup>b</sup>     | <1.0 × 10 <sup>3</sup>                                             |
| dT                                                     | <b>d5SICS</b> | nd <sup>b</sup>                       | nd <sup>b</sup>     | <1.0 × 10 <sup>3</sup>                                             |
| <b>d5SICS</b>                                          | <b>dMMO2</b>  | 9.7 ± 1.9                             | 8.7 ± 0.2           | 1.1 × 10 <sup>6</sup>                                              |
| <b>dMMO2</b>                                           | <b>dMMO2</b>  | 3.4 ± 0.6                             | 220 ± 4             | 1.5 × 10 <sup>4</sup>                                              |
| dA                                                     | <b>dMMO2</b>  | 4.2 ± 0.4                             | 73 ± 18             | 5.8 × 10 <sup>4</sup>                                              |
| dC                                                     | <b>dMMO2</b>  | nd <sup>b</sup>                       | nd <sup>b</sup>     | <1.0 × 10 <sup>3</sup>                                             |
| dG                                                     | <b>dMMO2</b>  | nd <sup>b</sup>                       | nd <sup>b</sup>     | <1.0 × 10 <sup>3</sup>                                             |
| dT                                                     | <b>dMMO2</b>  | 5.4 ± 0.5                             | 2912 ± 476          | 1.9 × 10 <sup>3</sup>                                              |

<sup>a</sup>See experimental section for experimental details. <sup>b</sup>Reaction was too inefficient for  $k_{\text{cat}}$  and  $K_{\text{M}}$  to be determined.

**Table S4.** T7–Mediated Extension of dX:dY Pairs<sup>a</sup>

| 5' –dTAAATACGACTCACTATAGGGAGA ( <b>X</b> )                      |               |                                       |                                  |                                                                    |
|-----------------------------------------------------------------|---------------|---------------------------------------|----------------------------------|--------------------------------------------------------------------|
| 3' –dATTATGCTGAGTGATATCCCTCT ( <b>Y</b> ) GCTAGGTTACGGCAGGATCGC |               |                                       |                                  |                                                                    |
| <b>X</b>                                                        | <b>Y</b>      | $k_{\text{cat}}$ (min <sup>-1</sup> ) | $K_{\text{M}}$ ( $\mu\text{M}$ ) | $k_{\text{cat}}/K_{\text{M}}$ (M <sup>-1</sup> min <sup>-1</sup> ) |
| dA                                                              | dT            | 4.3 ± 0.6                             | 0.32 ± 0.04                      | 1.3 × 10 <sup>7</sup>                                              |
| dG                                                              | dT            | 2.1 ± 0.5                             | 119 ± 21                         | 1.8 × 10 <sup>4</sup>                                              |
| <b>dPICS</b>                                                    | <b>dPICS</b>  | 0.22 ± 0.05                           | 81 ± 25                          | 2.8 × 10 <sup>3</sup>                                              |
| dA                                                              | <b>dPICS</b>  | nd <sup>b</sup>                       | nd <sup>b</sup>                  | <1.0 × 10 <sup>3</sup>                                             |
| <b>d7AI</b>                                                     | <b>d7AI</b>   | nd <sup>b</sup>                       | nd <sup>b</sup>                  | <1.0 × 10 <sup>3</sup>                                             |
| dA                                                              | <b>d7AI</b>   | nd <sup>b</sup>                       | nd <sup>b</sup>                  | <1.0 × 10 <sup>3</sup>                                             |
| dC                                                              | <b>d7AI</b>   | nd <sup>b</sup>                       | nd <sup>b</sup>                  | <1.0 × 10 <sup>3</sup>                                             |
| <b>d3FB</b>                                                     | <b>d3FB</b>   | 3.6 ± 0.3                             | 24 ± 4                           | 1.5 × 10 <sup>5</sup>                                              |
| dA                                                              | <b>d3FB</b>   | nd <sup>b</sup>                       | nd <sup>b</sup>                  | <1.0 × 10 <sup>3</sup>                                             |
| dT                                                              | <b>d3FB</b>   | 0.49 ± 0.01                           | 144 ± 6                          | 3.4 × 10 <sup>3</sup>                                              |
| <b>dMMO2</b>                                                    | <b>d5SICS</b> | 2.4 ± 0.5                             | 4.4 ± 1.9                        | 5.4 × 10 <sup>5</sup>                                              |
| <b>d5SICS</b>                                                   | <b>d5SICS</b> | nd <sup>b</sup>                       | nd <sup>b</sup>                  | <1.0 × 10 <sup>3</sup>                                             |
| dA                                                              | <b>d5SICS</b> | nd <sup>b</sup>                       | nd <sup>b</sup>                  | <1.0 × 10 <sup>3</sup>                                             |
| dG                                                              | <b>d5SICS</b> | nd <sup>b</sup>                       | nd <sup>b</sup>                  | <1.0 × 10 <sup>3</sup>                                             |
| <b>d5SICS</b>                                                   | <b>dMMO2</b>  | 3.2 ± 0.6                             | 2.9 ± 0.7                        | 1.1 × 10 <sup>6</sup>                                              |
| <b>dMMO2</b>                                                    | <b>dMMO2</b>  | 2.0 ± 0.3                             | 342 ± 80                         | 5.9 × 10 <sup>3</sup>                                              |
| dA                                                              | <b>dMMO2</b>  | nd <sup>b</sup>                       | nd <sup>b</sup>                  | <1.0 × 10 <sup>3</sup>                                             |

<sup>a</sup>See experimental section for experimental details. <sup>b</sup>Reaction was too inefficient for  $k_{\text{cat}}$  and  $K_{\text{M}}$  to be determined.

**Table S5.** Taq-Mediated Incorporation of Natural and Unnatural Triphosphates dNTPs (dXTPs)<sup>a</sup>

| 5' -dTAATACGACTCACTATAGGGAGA                           |               |                                       |                                  |                                                                    |
|--------------------------------------------------------|---------------|---------------------------------------|----------------------------------|--------------------------------------------------------------------|
| 3' -dATTATGCTGAGTGATATCCCTCT (Y) GCTAGGTTACGGCAGGATCGC |               |                                       |                                  |                                                                    |
| X                                                      | Y             | $k_{\text{cat}}$ (min <sup>-1</sup> ) | $K_{\text{M}}$ ( $\mu\text{M}$ ) | $k_{\text{cat}}/K_{\text{M}}$ (M <sup>-1</sup> min <sup>-1</sup> ) |
| dA                                                     | dT            | 0.81 ± 0.20                           | 0.020 ± 0.008                    | 4.0 × 10 <sup>7</sup>                                              |
| dG                                                     | dT            | 3.4 ± 0.1                             | 137 ± 28                         | 2.5 × 10 <sup>4</sup>                                              |
| <b>dPICS</b>                                           | <b>dPICS</b>  | 3.7 ± 0.2                             | 144 ± 18                         | 2.6 × 10 <sup>4</sup>                                              |
| dA                                                     | <b>dPICS</b>  | nd <sup>b</sup>                       | nd <sup>b</sup>                  | <1.0 × 10 <sup>3</sup>                                             |
| dC                                                     | <b>dPICS</b>  | nd <sup>b</sup>                       | nd <sup>b</sup>                  | <1.0 × 10 <sup>3</sup>                                             |
| dG                                                     | <b>dPICS</b>  | nd <sup>b</sup>                       | nd <sup>b</sup>                  | <1.0 × 10 <sup>3</sup>                                             |
| dT                                                     | <b>dPICS</b>  | 0.24 ± 0.04                           | 195 ± 30                         | 1.2 × 10 <sup>3</sup>                                              |
| <b>d7AI</b>                                            | <b>d7AI</b>   | 1.8 ± 0.2                             | 155 ± 1                          | 1.2 × 10 <sup>4</sup>                                              |
| dA                                                     | <b>d7AI</b>   | 0.67 ± 0.04                           | 162 ± 16                         | 4.1 × 10 <sup>3</sup>                                              |
| dC                                                     | <b>d7AI</b>   | nd <sup>b</sup>                       | nd <sup>b</sup>                  | <1.0 × 10 <sup>3</sup>                                             |
| dG                                                     | <b>d7AI</b>   | nd <sup>b</sup>                       | nd <sup>b</sup>                  | <1.0 × 10 <sup>3</sup>                                             |
| dT                                                     | <b>d7AI</b>   | 0.40 ± 0.12                           | 176 ± 17                         | 2.3 × 10 <sup>3</sup>                                              |
| <b>d3FB</b>                                            | <b>d3FB</b>   | 3.0 ± 0.4                             | 203 ± 14                         | 1.5 × 10 <sup>4</sup>                                              |
| dA                                                     | <b>d3FB</b>   | 5.8 ± 1.3                             | 63 ± 1                           | 9.1 × 10 <sup>4</sup>                                              |
| dC                                                     | <b>d3FB</b>   | 0.17 ± 0.01                           | 84 ± 10                          | 2.1 × 10 <sup>3</sup>                                              |
| dG                                                     | <b>d3FB</b>   | nd <sup>b</sup>                       | nd <sup>b</sup>                  | <1.0 × 10 <sup>3</sup>                                             |
| dT                                                     | <b>d3FB</b>   | 3.7 ± 0.9                             | 132 ± 8                          | 2.8 × 10 <sup>4</sup>                                              |
| <b>dMMO2</b>                                           | <b>d5SICS</b> | 1.3 ± 0.2                             | 16 ± 1                           | 8.6 × 10 <sup>4</sup>                                              |
| <b>d5SICS</b>                                          | <b>d5SICS</b> | 1.2 ± 0.1                             | 375 ± 62                         | 3.2 × 10 <sup>3</sup>                                              |
| dA                                                     | <b>d5SICS</b> | 0.74 ± 0.11                           | 274 ± 40                         | 2.7 × 10 <sup>3</sup>                                              |
| dC                                                     | <b>d5SICS</b> | nd <sup>b</sup>                       | nd <sup>b</sup>                  | <1.0 × 10 <sup>3</sup>                                             |
| dG                                                     | <b>d5SICS</b> | 4.0 ± 1.1                             | 110 ± 15                         | 3.7 × 10 <sup>4</sup>                                              |
| dT                                                     | <b>d5SICS</b> | 0.96 ± 0.09                           | 261 ± 48                         | 3.7 × 10 <sup>3</sup>                                              |
| <b>d5SICS</b>                                          | <b>dMMO2</b>  | 3.0 ± 0.2                             | 0.88 ± 0.10                      | 3.5 × 10 <sup>6</sup>                                              |
| <b>dMMO2</b>                                           | <b>dMMO2</b>  | 1.1 ± 0.1                             | 52 ± 13                          | 2.1 × 10 <sup>4</sup>                                              |
| dA                                                     | <b>dMMO2</b>  | 6.4 ± 0.9                             | 59 ± 6                           | 1.1 × 10 <sup>5</sup>                                              |
| dC                                                     | <b>dMMO2</b>  | nd <sup>b</sup>                       | nd <sup>b</sup>                  | <1.0 × 10 <sup>3</sup>                                             |
| dG                                                     | <b>dMMO2</b>  | nd <sup>b</sup>                       | nd <sup>b</sup>                  | <1.0 × 10 <sup>3</sup>                                             |
| dT                                                     | <b>dMMO2</b>  | 1.8 ± 0.1                             | 214 ± 28                         | 8.2 × 10 <sup>3</sup>                                              |

<sup>a</sup>See experimental section for experimental details. <sup>b</sup>Reaction was too inefficient for  $k_{\text{cat}}$  and  $K_{\text{M}}$  to be determined.

**Table S6.** Taq-Mediated Extension of dX:dY Pairs<sup>a</sup>

| 5' -dTAATACGACTCACTATAGGGAGA ( <b>X</b> )                       |               |                                       |                                  |                                                                    |
|-----------------------------------------------------------------|---------------|---------------------------------------|----------------------------------|--------------------------------------------------------------------|
| 3' -dATTATGCTGAGTGATATCCCTCT ( <b>Y</b> ) GCTAGGTTACGGCAGGATCGC |               |                                       |                                  |                                                                    |
| <b>X</b>                                                        | <b>Y</b>      | $k_{\text{cat}}$ (min <sup>-1</sup> ) | $K_{\text{M}}$ ( $\mu\text{M}$ ) | $k_{\text{cat}}/K_{\text{M}}$ (M <sup>-1</sup> min <sup>-1</sup> ) |
| dA                                                              | dT            | 1.8 ± 0.1                             | 0.096 ± 0.014                    | 1.9 × 10 <sup>7</sup>                                              |
| dG                                                              | dT            | 1.6 ± 0.4                             | 218 ± 16                         | 7.4 × 10 <sup>3</sup>                                              |
| <b>dPICS</b>                                                    | <b>dPICS</b>  | nd <sup>b</sup>                       | nd <sup>b</sup>                  | <1.0 × 10 <sup>3</sup>                                             |
| dT                                                              | <b>dPICS</b>  | 0.29 ± 0.04                           | 184 ± 14                         | 1.6 × 10 <sup>3</sup>                                              |
| <b>d7AI</b>                                                     | <b>d7AI</b>   | nd <sup>b</sup>                       | nd <sup>b</sup>                  | <1.0 × 10 <sup>3</sup>                                             |
| dA                                                              | <b>d7AI</b>   | nd <sup>b</sup>                       | nd <sup>b</sup>                  | <1.0 × 10 <sup>3</sup>                                             |
| <b>d3FB</b>                                                     | <b>d3FB</b>   | 2.2 ± 0.6                             | 141 ± 7                          | 1.6 × 10 <sup>4</sup>                                              |
| dA                                                              | <b>d3FB</b>   | nd <sup>b</sup>                       | nd <sup>b</sup>                  | <1.0 × 10 <sup>3</sup>                                             |
| dT                                                              | <b>d3FB</b>   | 0.24 ± 0.02                           | 225 ± 59                         | 1.1 × 10 <sup>3</sup>                                              |
| <b>dMMO2</b>                                                    | <b>d5SICS</b> | 0.95 ± 0.03                           | 44 ± 3                           | 2.2 × 10 <sup>4</sup>                                              |
| <b>d5SICS</b>                                                   | <b>d5SICS</b> | nd <sup>b</sup>                       | nd <sup>b</sup>                  | <1.0 × 10 <sup>3</sup>                                             |
| dA                                                              | <b>d5SICS</b> | nd <sup>b</sup>                       | nd <sup>b</sup>                  | <1.0 × 10 <sup>3</sup>                                             |
| dG                                                              | <b>d5SICS</b> | nd <sup>b</sup>                       | nd <sup>b</sup>                  | <1.0 × 10 <sup>3</sup>                                             |
| dT                                                              | <b>d5SICS</b> | 0.92 ± 0.07                           | 196 ± 35                         | 4.7 × 10 <sup>3</sup>                                              |
| <b>d5SICS</b>                                                   | <b>dMMO2</b>  | 2.6 ± 0.9                             | 41 ± 6                           | 6.4 × 10 <sup>4</sup>                                              |
| <b>dMMO2</b>                                                    | <b>dMMO2</b>  | nd <sup>b</sup>                       | nd <sup>b</sup>                  | <1.0 × 10 <sup>3</sup>                                             |
| dA                                                              | <b>dMMO2</b>  | 0.59 ± 0.01                           | 359 ± 29                         | 1.7 × 10 <sup>3</sup>                                              |
| dT                                                              | <b>dMMO2</b>  | 0.90 ± 0.01                           | 84 ± 8                           | 1.1 × 10 <sup>4</sup>                                              |

<sup>a</sup>See experimental section for experimental details. <sup>b</sup>Reaction was too inefficient for  $k_{\text{cat}}$  and  $K_{\text{M}}$  to be determined.

**Table S7.** Vent—Mediated Incorporation of Natural and Unnatural Triphosphates dNTPs (dXTPs)<sup>a</sup>

| 5' -dTAATACGACTCACTATAGGGAGA                           |               |                                       |                                  |                                                                    |
|--------------------------------------------------------|---------------|---------------------------------------|----------------------------------|--------------------------------------------------------------------|
| 3' -dATTATGCTGAGTGATATCCCTCT (Y) GCTAGGTTACGGCAGGATCGC |               |                                       |                                  |                                                                    |
| X                                                      | Y             | $k_{\text{cat}}$ (min <sup>-1</sup> ) | $K_{\text{M}}$ ( $\mu\text{M}$ ) | $k_{\text{cat}}/K_{\text{M}}$ (M <sup>-1</sup> min <sup>-1</sup> ) |
| dA                                                     | dT            | 1.3 ± 0.1                             | 0.11 ± 0.01                      | 1.2 × 10 <sup>7</sup>                                              |
| dG                                                     | dT            | 2.2 ± 0.4                             | 129 ± 45                         | 1.7 × 10 <sup>4</sup>                                              |
| <b>dPICS</b>                                           | <b>dPICS</b>  | 3.3 ± 0.1                             | 52 ± 18                          | 6.4 × 10 <sup>4</sup>                                              |
| dA                                                     | <b>dPICS</b>  | 1.9 ± 0.6                             | 121 ± 16                         | 1.6 × 10 <sup>4</sup>                                              |
| dC                                                     | <b>dPICS</b>  | nd <sup>b</sup>                       | nd <sup>b</sup>                  | <1.0 × 10 <sup>3</sup>                                             |
| dG                                                     | <b>dPICS</b>  | 1.5 ± 0.4                             | 269 ± 98                         | 5.5 × 10 <sup>3</sup>                                              |
| dT                                                     | <b>dPICS</b>  | 3.5 ± 0.2                             | 427 ± 97                         | 8.3 × 10 <sup>3</sup>                                              |
| <b>d7AI</b>                                            | <b>d7AI</b>   | 2.7 ± 0.3                             | 124 ± 17                         | 2.2 × 10 <sup>4</sup>                                              |
| dA                                                     | <b>d7AI</b>   | 2.5 ± 0.1                             | 167 ± 10                         | 1.5 × 10 <sup>4</sup>                                              |
| dC                                                     | <b>d7AI</b>   | 0.73 ± 0.22                           | 244 ± 36                         | 3.0 × 10 <sup>3</sup>                                              |
| dG                                                     | <b>d7AI</b>   | 1.7 ± 0.3                             | 852 ± 90                         | 2.0 × 10 <sup>3</sup>                                              |
| dT                                                     | <b>d7AI</b>   | 2.9 ± 0.6                             | 174 ± 43                         | 1.7 × 10 <sup>4</sup>                                              |
| <b>d3FB</b>                                            | <b>d3FB</b>   | 0.97 ± 0.03                           | 21 ± 5                           | 4.6 × 10 <sup>4</sup>                                              |
| dA                                                     | <b>d3FB</b>   | 4.4 ± 0.5                             | 68 ± 8                           | 6.4 × 10 <sup>4</sup>                                              |
| dC                                                     | <b>d3FB</b>   | 0.83 ± 0.17                           | 278 ± 46                         | 3.0 × 10 <sup>3</sup>                                              |
| dG                                                     | <b>d3FB</b>   | 1.5 ± 0.2                             | 293 ± 39                         | 5.1 × 10 <sup>3</sup>                                              |
| dT                                                     | <b>d3FB</b>   | 1.8 ± 0.6                             | 69 ± 4                           | 2.6 × 10 <sup>4</sup>                                              |
| <b>dMMO2</b>                                           | <b>d5SICS</b> | 2.5 ± 0.4                             | 1.9 ± 0.4                        | 1.3 × 10 <sup>6</sup>                                              |
| <b>d5SICS</b>                                          | <b>d5SICS</b> | 5.7 ± 0.9                             | 11 ± 1                           | 5.0 × 10 <sup>5</sup>                                              |
| dA                                                     | <b>d5SICS</b> | 6.5 ± 0.5                             | 129 ± 26                         | 5.0 × 10 <sup>4</sup>                                              |
| dC                                                     | <b>d5SICS</b> | nd <sup>b</sup>                       | nd <sup>b</sup>                  | <1.0 × 10 <sup>3</sup>                                             |
| dG                                                     | <b>d5SICS</b> | 5.9 ± 0.5                             | 154 ± 43                         | 3.8 × 10 <sup>4</sup>                                              |
| dT                                                     | <b>d5SICS</b> | 2.6 ± 0.6                             | 37 ± 7                           | 7.0 × 10 <sup>4</sup>                                              |
| <b>d5SICS</b>                                          | <b>dMMO2</b>  | 3.1 ± 0.2                             | 0.31 ± 0.03                      | 9.9 × 10 <sup>6</sup>                                              |
| <b>dMMO2</b>                                           | <b>dMMO2</b>  | 2.2 ± 0.4                             | 18 ± 4                           | 1.2 × 10 <sup>5</sup>                                              |
| dA                                                     | <b>dMMO2</b>  | 2.1 ± 0.2                             | 66 ± 5                           | 3.2 × 10 <sup>4</sup>                                              |
| dC                                                     | <b>dMMO2</b>  | 1.2 ± 0.2                             | 27 ± 2                           | 4.4 × 10 <sup>4</sup>                                              |
| dG                                                     | <b>dMMO2</b>  | 1.1 ± 0.3                             | 393 ± 84                         | 2.9 × 10 <sup>3</sup>                                              |
| dT                                                     | <b>dMMO2</b>  | 1.4 ± 0.4                             | 11 ± 1                           | 1.2 × 10 <sup>5</sup>                                              |

<sup>a</sup>See experimental section for experimental details. <sup>b</sup>Reaction was too inefficient for  $k_{\text{cat}}$  and  $K_{\text{M}}$  to be determined.



**Table S8.** Vent-Mediated Extension of dX:dY Pairs<sup>a</sup>

| 5' -dTAATACGACTCACTATAGGGAGA ( <b>X</b> )                       |               |                                       |                                  |                                                                    |
|-----------------------------------------------------------------|---------------|---------------------------------------|----------------------------------|--------------------------------------------------------------------|
| 3' -dATTATGCTGAGTGATATCCCTCT ( <b>Y</b> ) GCTAGGTTACGGCAGGATCGC |               |                                       |                                  |                                                                    |
| <b>X</b>                                                        | <b>Y</b>      | $k_{\text{cat}}$ (min <sup>-1</sup> ) | $K_{\text{M}}$ ( $\mu\text{M}$ ) | $k_{\text{cat}}/K_{\text{M}}$ (M <sup>-1</sup> min <sup>-1</sup> ) |
| dA                                                              | dT            | 0.68 ± 0.11                           | 0.23 ± 0.03                      | 2.9 × 10 <sup>6</sup>                                              |
| dG                                                              | dT            | 0.40 ± 0.11                           | 27 ± 6                           | 1.5 × 10 <sup>4</sup>                                              |
| <b>dPICS</b>                                                    | <b>dPICS</b>  | nd <sup>b</sup>                       | nd <sup>b</sup>                  | <1.0 × 10 <sup>3</sup>                                             |
| dA                                                              | <b>dPICS</b>  | nd <sup>b</sup>                       | nd <sup>b</sup>                  | <1.0 × 10 <sup>3</sup>                                             |
| dG                                                              | <b>dPICS</b>  | nd <sup>b</sup>                       | nd <sup>b</sup>                  | <1.0 × 10 <sup>3</sup>                                             |
| dT                                                              | <b>dPICS</b>  | 0.33 ± 0.02                           | 308 ± 12                         | 1.1 × 10 <sup>3</sup>                                              |
| <b>d7AI</b>                                                     | <b>d7AI</b>   | nd <sup>b</sup>                       | nd <sup>b</sup>                  | <1.0 × 10 <sup>3</sup>                                             |
| dA                                                              | <b>d7AI</b>   | nd <sup>b</sup>                       | nd <sup>b</sup>                  | <1.0 × 10 <sup>3</sup>                                             |
| dT                                                              | <b>d7AI</b>   | 0.30 ± 0.05                           | 288 ± 1                          | 1.0 × 10 <sup>3</sup>                                              |
| <b>d3FB</b>                                                     | <b>d3FB</b>   | 3.0 ± 0.2                             | 524 ± 17                         | 5.7 × 10 <sup>3</sup>                                              |
| dA                                                              | <b>d3FB</b>   | 0.50 ± 0.06                           | 435 ± 88                         | 1.1 × 10 <sup>3</sup>                                              |
| dT                                                              | <b>d3FB</b>   | nd <sup>b</sup>                       | nd <sup>b</sup>                  | <1.0 × 10 <sup>3</sup>                                             |
| <b>dMMO2</b>                                                    | <b>d5SICS</b> | 0.95 ± 0.17                           | 153 ± 11                         | 6.2 × 10 <sup>3</sup>                                              |
| <b>d5SICS</b>                                                   | <b>d5SICS</b> | nd <sup>b</sup>                       | nd <sup>b</sup>                  | <1.0 × 10 <sup>3</sup>                                             |
| dA                                                              | <b>d5SICS</b> | nd <sup>b</sup>                       | nd <sup>b</sup>                  | <1.0 × 10 <sup>3</sup>                                             |
| dG                                                              | <b>d5SICS</b> | nd <sup>b</sup>                       | nd <sup>b</sup>                  | <1.0 × 10 <sup>3</sup>                                             |
| dT                                                              | <b>d5SICS</b> | nd <sup>b</sup>                       | nd <sup>b</sup>                  | <1.0 × 10 <sup>3</sup>                                             |
| <b>d5SICS</b>                                                   | <b>dMMO2</b>  | 1.1 ± 0.1                             | 145 ± 22                         | 7.9 × 10 <sup>3</sup>                                              |
| <b>dMMO2</b>                                                    | <b>dMMO2</b>  | 0.18 ± 0.02                           | 150 ± 5                          | 1.2 × 10 <sup>3</sup>                                              |
| dT                                                              | <b>dMMO2</b>  | 0.14 ± 0.02                           | 36 ± 11                          | 3.8 × 10 <sup>3</sup>                                              |

<sup>a</sup>See experimental section for experimental details. <sup>b</sup>Reaction was too inefficient for  $k_{\text{cat}}$  and  $K_{\text{M}}$  to be determined.

**Table S9.** Therminator—Mediated Incorporation of Natural and Unnatural Triphosphates dNTPs (dXTPs)<sup>a</sup>

| 5' -dTAAATACGACTCACTATAGGGAGA                          |               |                                       |                     |                                                                    |
|--------------------------------------------------------|---------------|---------------------------------------|---------------------|--------------------------------------------------------------------|
| 3' -dATTATGCTGAGTGATATCCCTCT (Y) GCTAGGTTACGGCAGGATCGC |               |                                       |                     |                                                                    |
| X                                                      | Y             | $k_{\text{cat}}$ (min <sup>-1</sup> ) | $K_{\text{M}}$ (μM) | $k_{\text{cat}}/K_{\text{M}}$ (M <sup>-1</sup> min <sup>-1</sup> ) |
| dA                                                     | dT            | 0.30 ± 0.02                           | 0.0020 ± 0.0006     | 1.5 × 10 <sup>8</sup>                                              |
| dG                                                     | dT            | 0.62 ± 0.01                           | 0.33 ± 0.02         | 1.9 × 10 <sup>6</sup>                                              |
| <b>dPICS</b>                                           | <b>dPICS</b>  | 0.43 ± 0.08                           | 0.16 ± 0.03         | 2.7 × 10 <sup>6</sup>                                              |
| dA                                                     | <b>dPICS</b>  | 0.40 ± 0.05                           | 0.38 ± 0.07         | 1.1 × 10 <sup>6</sup>                                              |
| dC                                                     | <b>dPICS</b>  | 0.36 ± 0.09                           | 2.0 ± 0.6           | 1.8 × 10 <sup>5</sup>                                              |
| dG                                                     | <b>dPICS</b>  | 0.64 ± 0.10                           | 2.4 ± 0.1           | 2.6 × 10 <sup>5</sup>                                              |
| dT                                                     | <b>dPICS</b>  | 0.89 ± 0.22                           | 2.1 ± 0.5           | 4.3 × 10 <sup>5</sup>                                              |
| <b>d7AI</b>                                            | <b>d7AI</b>   | 0.38 ± 0.10                           | 0.090 ± 0.018       | 4.2 × 10 <sup>6</sup>                                              |
| dA                                                     | <b>d7AI</b>   | 0.54 ± 0.04                           | 0.59 ± 0.10         | 9.2 × 10 <sup>5</sup>                                              |
| dC                                                     | <b>d7AI</b>   | 0.53 ± 0.05                           | 4.6 ± 1.1           | 1.2 × 10 <sup>5</sup>                                              |
| dG                                                     | <b>d7AI</b>   | 0.62 ± 0.10                           | 5.6 ± 0.3           | 1.1 × 10 <sup>5</sup>                                              |
| dT                                                     | <b>d7AI</b>   | 0.71 ± 0.03                           | 1.3 ± 0.1           | 5.3 × 10 <sup>5</sup>                                              |
| <b>d3FB</b>                                            | <b>d3FB</b>   | 0.94 ± 0.24                           | 0.41 ± 0.06         | 2.3 × 10 <sup>6</sup>                                              |
| dA                                                     | <b>d3FB</b>   | 1.1 ± 0.2                             | 0.27 ± 0.02         | 4.0 × 10 <sup>6</sup>                                              |
| dC                                                     | <b>d3FB</b>   | 0.98 ± 0.27                           | 4.3 ± 0.7           | 2.3 × 10 <sup>5</sup>                                              |
| dG                                                     | <b>d3FB</b>   | 0.80 ± 0.09                           | 2.0 ± 0.2           | 4.1 × 10 <sup>5</sup>                                              |
| dT                                                     | <b>d3FB</b>   | 1.1 ± 0.3                             | 2.3 ± 0.9           | 4.6 × 10 <sup>5</sup>                                              |
| <b>dMMO2</b>                                           | <b>d5SICS</b> | 0.66 ± 0.01                           | 0.015 ± 0.002       | 4.5 × 10 <sup>7</sup>                                              |
| <b>d5SICS</b>                                          | <b>d5SICS</b> | 0.66 ± 0.10                           | 0.045 ± 0.004       | 1.4 × 10 <sup>7</sup>                                              |
| dA                                                     | <b>d5SICS</b> | 0.79 ± 0.11                           | 0.83 ± 0.22         | 9.5 × 10 <sup>5</sup>                                              |
| dC                                                     | <b>d5SICS</b> | 0.26 ± 0.10                           | 4.4 ± 1.5           | 6.0 × 10 <sup>4</sup>                                              |
| dG                                                     | <b>d5SICS</b> | 1.0 ± 0.1                             | 1.2 ± 0.2           | 8.1 × 10 <sup>5</sup>                                              |
| dT                                                     | <b>d5SICS</b> | 1.2 ± 0.2                             | 2.7 ± 0.2           | 4.5 × 10 <sup>5</sup>                                              |
| <b>d5SICS</b>                                          | <b>dMMO2</b>  | 0.51 ± 0.07                           | 0.013 ± 0.003       | 4.0 × 10 <sup>7</sup>                                              |
| <b>dMMO2</b>                                           | <b>dMMO2</b>  | 0.44 ± 0.03                           | 0.060 ± 0.017       | 7.3 × 10 <sup>6</sup>                                              |
| dA                                                     | <b>dMMO2</b>  | 0.81 ± 0.08                           | 0.31 ± 0.02         | 2.6 × 10 <sup>6</sup>                                              |
| dC                                                     | <b>dMMO2</b>  | 1.3 ± 0.2                             | 2.6 ± 0.4           | 5.1 × 10 <sup>5</sup>                                              |
| dG                                                     | <b>dMMO2</b>  | 0.68 ± 0.09                           | 5.7 ± 1.2           | 1.2 × 10 <sup>5</sup>                                              |
| dT                                                     | <b>dMMO2</b>  | 1.3 ± 0.5                             | 1.1 ± 0.3           | 1.2 × 10 <sup>6</sup>                                              |

<sup>a</sup>See experimental section for experimental details.

**Table S10.** Therminator–Mediated Extension of dX:dY Pairs<sup>a</sup>

| 5'–dTAATACGACTCACTATAGGGAGA ( <b>X</b> )                       |               |                                       |                                  |                                                                    |
|----------------------------------------------------------------|---------------|---------------------------------------|----------------------------------|--------------------------------------------------------------------|
| 3'–dATTATGCTGAGTGATATCCCTCT ( <b>Y</b> ) GCTAGGTTACGGCAGGATCGC |               |                                       |                                  |                                                                    |
| <b>X</b>                                                       | <b>Y</b>      | $k_{\text{cat}}$ (min <sup>-1</sup> ) | $K_{\text{M}}$ ( $\mu\text{M}$ ) | $k_{\text{cat}}/K_{\text{M}}$ (M <sup>-1</sup> min <sup>-1</sup> ) |
| dA                                                             | dT            | 0.15 ± 0.01                           | 0.044 ± 0.013                    | 3.4 × 10 <sup>6</sup>                                              |
| dG                                                             | dT            | 0.45 ± 0.10                           | 0.63 ± 0.05                      | 7.1 × 10 <sup>5</sup>                                              |
| <b>dPICS</b>                                                   | <b>dPICS</b>  | 0.65 ± 0.07                           | 59 ± 12                          | 1.1 × 10 <sup>4</sup>                                              |
| dA                                                             | <b>dPICS</b>  | 0.32 ± 0.02                           | 23 ± 1                           | 1.4 × 10 <sup>4</sup>                                              |
| <b>d7AI</b>                                                    | <b>d7AI</b>   | 0.34 ± 0.04                           | 2.8 ± 0.2                        | 1.2 × 10 <sup>5</sup>                                              |
| dA                                                             | <b>d7AI</b>   | 0.35 ± 0.02                           | 40 ± 7                           | 8.7 × 10 <sup>3</sup>                                              |
| dT                                                             | <b>d7AI</b>   | 0.45 ± 0.10                           | 16 ± 2                           | 2.8 × 10 <sup>4</sup>                                              |
| <b>d3FB</b>                                                    | <b>d3FB</b>   | 1.7 ± 0.1                             | 2.2 ± 0.2                        | 7.8 × 10 <sup>5</sup>                                              |
| dA                                                             | <b>d3FB</b>   | 0.47 ± 0.08                           | 157 ± 16                         | 3.0 × 10 <sup>3</sup>                                              |
| <b>dMMO2</b>                                                   | <b>d5SICS</b> | 0.56 ± 0.14                           | 1.2 ± 0.2                        | 4.6 × 10 <sup>5</sup>                                              |
| <b>d5SICS</b>                                                  | <b>d5SICS</b> | 0.47 ± 0.08                           | 104 ± 23                         | 4.5 × 10 <sup>3</sup>                                              |
| dA                                                             | <b>d5SICS</b> | 0.33 ± 0.09                           | 3.7 ± 0.4                        | 8.8 × 10 <sup>4</sup>                                              |
| dG                                                             | <b>d5SICS</b> | 0.51 ± 0.11                           | 3.4 ± 0.6                        | 1.5 × 10 <sup>5</sup>                                              |
| dT                                                             | <b>d5SICS</b> | 0.45 ± 0.13                           | 2.0 ± 0.1                        | 2.3 × 10 <sup>5</sup>                                              |
| <b>d5SICS</b>                                                  | <b>dMMO2</b>  | 0.60 ± 0.15                           | 2.4 ± 0.9                        | 2.5 × 10 <sup>5</sup>                                              |
| <b>dMMO2</b>                                                   | <b>dMMO2</b>  | 0.25 ± 0.05                           | 3.7 ± 0.8                        | 6.8 × 10 <sup>4</sup>                                              |
| dA                                                             | <b>dMMO2</b>  | 0.22 ± 0.02                           | 151 ± 19                         | 1.5 × 10 <sup>3</sup>                                              |
| dC                                                             | <b>dMMO2</b>  | 0.34 ± 0.05                           | 9.7 ± 1.1                        | 3.5 × 10 <sup>4</sup>                                              |
| dG                                                             | <b>dMMO2</b>  | 0.24 ± 0.08                           | 201 ± 55                         | 1.2 × 10 <sup>3</sup>                                              |
| dT                                                             | <b>dMMO2</b>  | 1.1 ± 0.4                             | 24 ± 4                           | 4.4 × 10 <sup>4</sup>                                              |

<sup>a</sup>See experimental section for experimental details.

**Table S11.** Pol  $\beta$ -Mediated Incorporation of Natural and Unnatural Triphosphates dNTPs (dXTPs)<sup>a</sup>

| 5' -dTAATACGACTCACTATAGGGAGA                           |               |                                |                  |                                                    |
|--------------------------------------------------------|---------------|--------------------------------|------------------|----------------------------------------------------|
| 3' -dATTATGCTGAGTGATATCCCTCT (Y) GCTAGGTTACGGCAGGATCGC |               |                                |                  |                                                    |
| X                                                      | Y             | $k_{cat}$ (min <sup>-1</sup> ) | $K_M$ ( $\mu$ M) | $k_{cat}/K_M$ (M <sup>-1</sup> min <sup>-1</sup> ) |
| dA                                                     | dT            | 5.3 $\pm$ 0.6                  | 54 $\pm$ 8       | 9.8 $\times$ 10 <sup>4</sup>                       |
| dG                                                     | dT            | nd <sup>b</sup>                | nd <sup>b</sup>  | <1.0 $\times$ 10 <sup>3</sup>                      |
| <b>dPICS</b>                                           | <b>dPICS</b>  | nd <sup>b</sup>                | nd <sup>b</sup>  | <1.0 $\times$ 10 <sup>3</sup>                      |
| dA                                                     | <b>dPICS</b>  | nd <sup>b</sup>                | nd <sup>b</sup>  | <1.0 $\times$ 10 <sup>3</sup>                      |
| dC                                                     | <b>dPICS</b>  | nd <sup>b</sup>                | nd <sup>b</sup>  | <1.0 $\times$ 10 <sup>3</sup>                      |
| dG                                                     | <b>dPICS</b>  | nd <sup>b</sup>                | nd <sup>b</sup>  | <1.0 $\times$ 10 <sup>3</sup>                      |
| dT                                                     | <b>dPICS</b>  | nd <sup>b</sup>                | nd <sup>b</sup>  | <1.0 $\times$ 10 <sup>3</sup>                      |
| <b>d7AI</b>                                            | <b>d7AI</b>   | nd <sup>b</sup>                | nd <sup>b</sup>  | <1.0 $\times$ 10 <sup>3</sup>                      |
| dA                                                     | <b>d7AI</b>   | nd <sup>b</sup>                | nd <sup>b</sup>  | <1.0 $\times$ 10 <sup>3</sup>                      |
| dC                                                     | <b>d7AI</b>   | nd <sup>b</sup>                | nd <sup>b</sup>  | <1.0 $\times$ 10 <sup>3</sup>                      |
| dG                                                     | <b>d7AI</b>   | nd <sup>b</sup>                | nd <sup>b</sup>  | <1.0 $\times$ 10 <sup>3</sup>                      |
| dT                                                     | <b>d7AI</b>   | nd <sup>b</sup>                | nd <sup>b</sup>  | <1.0 $\times$ 10 <sup>3</sup>                      |
| <b>d3FB</b>                                            | <b>d3FB</b>   | nd <sup>b</sup>                | nd <sup>b</sup>  | <1.0 $\times$ 10 <sup>3</sup>                      |
| dA                                                     | <b>d3FB</b>   | nd <sup>b</sup>                | nd <sup>b</sup>  | <1.0 $\times$ 10 <sup>3</sup>                      |
| dC                                                     | <b>d3FB</b>   | nd <sup>b</sup>                | nd <sup>b</sup>  | <1.0 $\times$ 10 <sup>3</sup>                      |
| dG                                                     | <b>d3FB</b>   | nd <sup>b</sup>                | nd <sup>b</sup>  | <1.0 $\times$ 10 <sup>3</sup>                      |
| dT                                                     | <b>d3FB</b>   | nd <sup>b</sup>                | nd <sup>b</sup>  | <1.0 $\times$ 10 <sup>3</sup>                      |
| <b>dMMO2</b>                                           | <b>d5SICS</b> | nd <sup>b</sup>                | nd <sup>b</sup>  | <1.0 $\times$ 10 <sup>3</sup>                      |
| <b>d5SICS</b>                                          | <b>d5SICS</b> | nd <sup>b</sup>                | nd <sup>b</sup>  | <1.0 $\times$ 10 <sup>3</sup>                      |
| dA                                                     | <b>d5SICS</b> | nd <sup>b</sup>                | nd <sup>b</sup>  | <1.0 $\times$ 10 <sup>3</sup>                      |
| dC                                                     | <b>d5SICS</b> | 0.052 $\pm$ 0.010              | 6.7 $\pm$ 0.7    | 7.8 $\times$ 10 <sup>3</sup>                       |
| dG                                                     | <b>d5SICS</b> | nd <sup>b</sup>                | nd <sup>b</sup>  | <1.0 $\times$ 10 <sup>3</sup>                      |
| dT                                                     | <b>d5SICS</b> | nd <sup>b</sup>                | nd <sup>b</sup>  | <1.0 $\times$ 10 <sup>3</sup>                      |
| <b>d5SICS</b>                                          | <b>dMMO2</b>  | 0.20 $\pm$ 0.06                | 120 $\pm$ 19     | 1.6 $\times$ 10 <sup>3</sup>                       |
| <b>dMMO2</b>                                           | <b>dMMO2</b>  | nd <sup>b</sup>                | nd <sup>b</sup>  | <1.0 $\times$ 10 <sup>3</sup>                      |
| dA                                                     | <b>dMMO2</b>  | nd <sup>b</sup>                | nd <sup>b</sup>  | <1.0 $\times$ 10 <sup>3</sup>                      |
| dC                                                     | <b>dMMO2</b>  | 0.14 $\pm$ 0.01                | 22 $\pm$ 7       | 6.1 $\times$ 10 <sup>3</sup>                       |
| dG                                                     | <b>dMMO2</b>  | nd <sup>b</sup>                | nd <sup>b</sup>  | <1.0 $\times$ 10 <sup>3</sup>                      |
| dT                                                     | <b>dMMO2</b>  | nd <sup>b</sup>                | nd <sup>b</sup>  | <1.0 $\times$ 10 <sup>3</sup>                      |

<sup>a</sup>See experimental section for experimental details. <sup>b</sup>Reaction was too inefficient for  $k_{cat}$  and  $K_M$  to be determined.

**Table S12.** Pol  $\beta$ -Mediated Extension of dX:dY Pairs<sup>a</sup>

| 5' -dTAAATACGACTCACTATAGGGAGA ( <b>X</b> )                      |               |                                       |                         |                                                           |
|-----------------------------------------------------------------|---------------|---------------------------------------|-------------------------|-----------------------------------------------------------|
| 3' -dATTATGCTGAGTGATATCCCTCT ( <b>Y</b> ) GCTAGGTTACGGCAGGATCGC |               |                                       |                         |                                                           |
| <b>X</b>                                                        | <b>Y</b>      | $k_{\text{cat}}$ (min <sup>-1</sup> ) | $K_M$ ( $\mu\text{M}$ ) | $k_{\text{cat}}/K_M$ (M <sup>-1</sup> min <sup>-1</sup> ) |
| dA                                                              | dT            | 7.3 $\pm$ 0.1                         | 34 $\pm$ 2              | 2.1 $\times$ 10 <sup>5</sup>                              |
| dG                                                              | dT            | 0.46 $\pm$ 0.01                       | 166 $\pm$ 20            | 2.8 $\times$ 10 <sup>3</sup>                              |
| <b>dPICS</b>                                                    | <b>dPICS</b>  | 1.7 $\pm$ 0.2                         | 177 $\pm$ 13            | 9.7 $\times$ 10 <sup>3</sup>                              |
| dA                                                              | <b>dPICS</b>  | nd <sup>b</sup>                       | nd <sup>b</sup>         | <1.0 $\times$ 10 <sup>3</sup>                             |
| dT                                                              | <b>dPICS</b>  | 0.26 $\pm$ 0.01                       | 191 $\pm$ 3             | 1.3 $\times$ 10 <sup>3</sup>                              |
| <b>d7AI</b>                                                     | <b>d7AI</b>   | 3.1 $\pm$ 0.2                         | 71 $\pm$ 11             | 4.4 $\times$ 10 <sup>4</sup>                              |
| dA                                                              | <b>d7AI</b>   | 0.69 $\pm$ 0.04                       | 91 $\pm$ 2              | 7.6 $\times$ 10 <sup>3</sup>                              |
| <b>d3FB</b>                                                     | <b>d3FB</b>   | 8.3 $\pm$ 0.6                         | 99 $\pm$ 1              | 8.3 $\times$ 10 <sup>4</sup>                              |
| dA                                                              | <b>d3FB</b>   | 1.3 $\pm$ 0.1                         | 188 $\pm$ 9             | 6.7 $\times$ 10 <sup>3</sup>                              |
| <b>dMMO2</b>                                                    | <b>d5SICS</b> | 2.5 $\pm$ 0.2                         | 57 $\pm$ 10             | 4.4 $\times$ 10 <sup>4</sup>                              |
| <b>d5SICS</b>                                                   | <b>d5SICS</b> | 3.4 $\pm$ 1.0                         | 155 $\pm$ 32            | 2.2 $\times$ 10 <sup>4</sup>                              |
| dA                                                              | <b>d5SICS</b> | 0.98 $\pm$ 0.12                       | 254 $\pm$ 47            | 3.9 $\times$ 10 <sup>3</sup>                              |
| dC                                                              | <b>d5SICS</b> | 0.85 $\pm$ 0.03                       | 158 $\pm$ 10            | 5.3 $\times$ 10 <sup>3</sup>                              |
| dG                                                              | <b>d5SICS</b> | 0.96 $\pm$ 0.08                       | 237 $\pm$ 18            | 4.1 $\times$ 10 <sup>3</sup>                              |
| dT                                                              | <b>d5SICS</b> | 1.2 $\pm$ 0.1                         | 279 $\pm$ 22            | 4.4 $\times$ 10 <sup>3</sup>                              |
| <b>d5SICS</b>                                                   | <b>dMMO2</b>  | 4.7 $\pm$ 1.2                         | 12 $\pm$ 4              | 4.0 $\times$ 10 <sup>5</sup>                              |
| <b>dMMO2</b>                                                    | <b>dMMO2</b>  | 1.1 $\pm$ 0.2                         | 94 $\pm$ 23             | 1.2 $\times$ 10 <sup>4</sup>                              |
| dA                                                              | <b>dMMO2</b>  | 3.1 $\pm$ 0.1                         | 144 $\pm$ 2             | 2.2 $\times$ 10 <sup>4</sup>                              |
| dC                                                              | <b>dMMO2</b>  | 2.4 $\pm$ 0.2                         | 114 $\pm$ 5             | 2.1 $\times$ 10 <sup>4</sup>                              |

<sup>a</sup>See experimental section for experimental details. <sup>b</sup>Reaction was too inefficient for  $k_{\text{cat}}$  and  $K_M$  to be determined.

## References

1. Leconte, A. M.; Hwang, G. T.; Matsuda, S.; Capek, P.; Hari, Y.; Romesberg, F. E. *J. Am. Chem. Soc.* **2008**, *130*, 2336–2343.
2. Henry, A. A.; Olsen, A. G.; Matsuda, S.; Yu, C.; Geierstanger, B. H.; Romesberg, F. E. *J. Am. Chem. Soc.* **2004**, *126*, 6923–6931.
3. Ogawa, A. K.; Wu, Y.; McMinn, D. L.; Liu, J.; Schultz, P. G.; Romesberg, F. E. *J. Am. Chem. Soc.* **2000**, *122*, 3274–3287.
4. McMinn, D. L.; Ogawa, A. K.; Wu, Y.; Liu, J.; Schultz, P. G.; Romesberg, F. E. *J. Am. Chem. Soc.* **1999**, *121*, 11585–11586.
